# Supplementary material for: DNA topoisomerase 1 represses HIV-1 promoter activity through its interaction with a guanine quadruplex present in the LTR sequence
Source: PubMed Central journal article supplement (PMC10228017; doi:10.1186/s12977-023-00625-8), 2023-05-30

**A**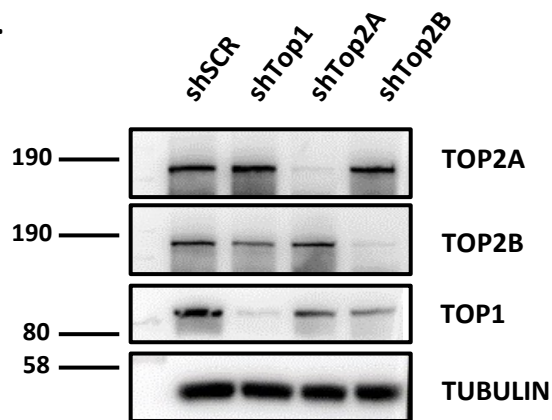**B.**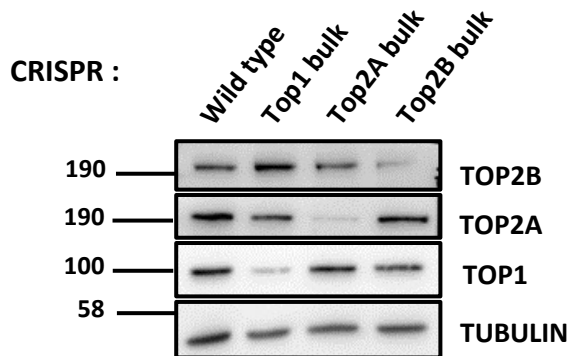**C.**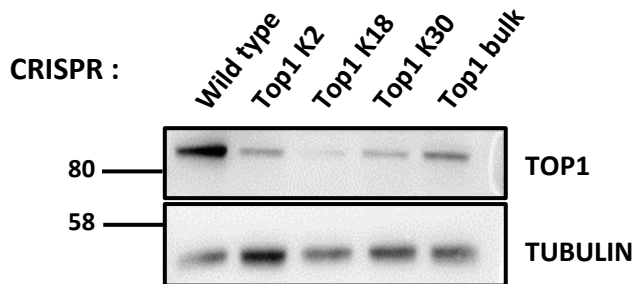**D.**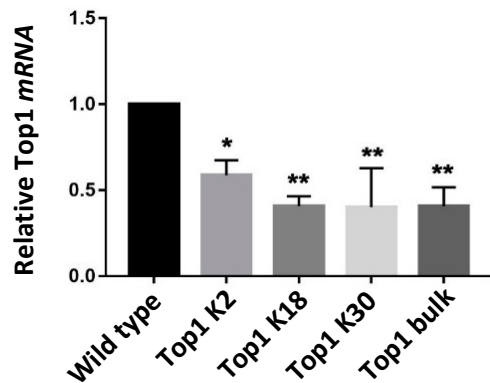

Supplement: 12977_2023_625_MOESM1_ESM.pdf [file 12977_2023_625_MOESM1_ESM.pdf]
