# Supplementary material for: DNA topoisomerase 1 represses HIV-1 promoter activity through its interaction with a guanine quadruplex present in the LTR sequence
Source: PubMed Central journal article supplement (PMC10228017; doi:10.1186/s12977-023-00625-8), 2023-05-30
Supplement: 12977_2023_625_MOESM4_ESM.pdf [file 12977_2023_625_MOESM4_ESM.pdf]

**A. Positive strand**

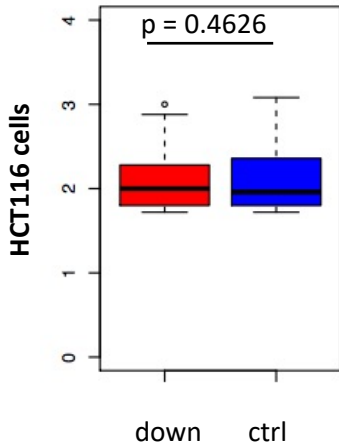

**B. Negative strand**

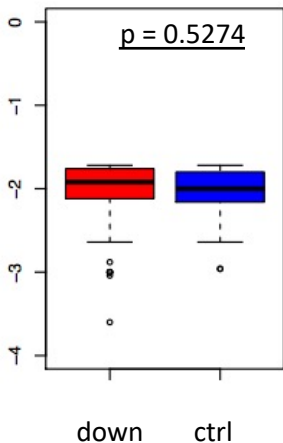

 Down-regulated genes  
in Top1 silenced cells

 Control genes
